# Supplementary material for: Involvement of M1-Activated Macrophages and Perforin/Granulysin Expressing Lymphocytes in IgA Vasculitis Nephritis
Source: MDPI journal article supplement (doi:10.3390/ijms25042253), 2024-02-13
Supplement: s1 [file s1]

Table 3. Antibodies used in the study.

| Target                          | Catalog number [Clone]               | Company                                               | Dilution   |
|---------------------------------|--------------------------------------|-------------------------------------------------------|------------|
| <b>Primary antibodies</b>       |                                      |                                                       |            |
| CD68                            | ab199000 [KP1 + C68/684], mouse IgG1 | Abcam, Cambridge, UK                                  | 1:100      |
| CD68                            | ab192847 [SP251], rabbit             | Abcam, Cambridge, UK                                  | 1:100      |
| iNOS                            | ab115819 [SP126], rabbit             | Abcam, Cambridge, UK                                  | 1:100      |
| Arginase-1                      | ab 212522 [ARG1/1125] mouse IgG3     | Abcam, Cambridge, UK                                  | 1:25       |
| CD3                             | ab21703 [SP7], rabbit                | Abcam, Cambridge, UK                                  | prediluted |
| NCAM (CD56)                     | ab204446, polyclonal rabbit          | Abcam, Cambridge, UK                                  | 1:100      |
| NKp44                           | MAB2249 [253422] mouse IgG2b         | R&D Systems, Minneapolis, Minnesota, USA              | 1:20       |
| Perforin                        | 556434 [δG9] mouse IgG2b             | BD Biosciences, San Diego, California, USA            | 1:100      |
| Granulysin                      | D-185-3 [RC8] mouse IgG1             | MBL International, Woburn, MA, USA                    | 1:100      |
| <b>Isotype controls</b>         |                                      |                                                       |            |
| Mouse IgG1                      | BD554121 [MOPC-21]                   | BD Bioscience, San Diego, California, USA             | 1:100      |
| Mouse IgG2a                     | 14-4724-82 [eBM2a]                   | Thermo Fisher Scientific, Waltham, Massachusetts, USA | 1:100      |
| Mouse IgG2b                     | BD557351 [MPC-11]                    | BD Biosciences, San Diego, California, USA            | 1:100      |
| Mouse IgG3                      | 14-4742-82 [B10]                     | Thermo Fisher Scientific, Waltham, Massachusetts, USA | 1:100      |
| Rabbit IgG                      | ab37415 [IgG]                        | Abcam, Cambridge, UK                                  | 1:200      |
| <b>Secondary antibodies</b>     |                                      |                                                       |            |
| Anti-mouse IgG Alexa Fluor 488  | A-11001 [goat IgG]                   | Thermo Fisher Scientific, Waltham, Massachusetts, USA | 1:300      |
| Anti-rabbit IgG Alexa Fluor 594 | A-11037 [goat IgG]                   | Thermo Fisher Scientific, Waltham, Massachusetts, USA | 1:500      |
| Anti-mouse IgG Alexa Fluor 594  | A 21203 [donkey IgG]                 | Thermo Fisher Scientific, Waltham, Massachusetts, USA | 1:300      |
| Anti-rabbit IgG Alexa Fluor 488 | A-21206 [donkey IgG]                 | Thermo Fisher Scientific, Waltham, Massachusetts, USA | 1:300      |

CD, Cluster of differentiation; IgG, Immunoglobulin G; iNOS, inducible Nitric Oxide Synthase; NCAM 1, Neural Cell Adhesion Molecule 1; NK, Natural Killer; NKp44, Natural Killer protein 44.
